# Supplementary material for: Efficacy of Patient Activation Interventions With or Without Financial Incentives to Promote Prescribing of Thiazides and Hypertension Control: A Randomized Clinical Trial
Source: PubMed Central journal article supplement (PMC6324341; doi:10.1001/jamanetworkopen.2018.5017), 2018-12-14
Supplement: jamanetwopen-1-e185017-s003.pdf [file jamanetwopen-1-e185017-s003.pdf]

## Data Sharing Statement

Kaboli. Efficacy of Patient Activation Interventions With or Without Financial Incentives to Promote Prescribing of Thiazides and Hypertension Control. *JAMA Netw Open*. Published December 14, 2018. 10.1001/jamanetworkopen.2018.5017

### Data

**Data available:** No

### Additional Information

**Explanation for why data not available:** We are not allowed to release VA data to others without local approvals. All VA data must remain within the VA firewall.
